# Supplementary material for: Clearance of senescent cells by ABT263 rejuvenates aged hematopoietic stem cells in mice
Source: Springer Nature journal article supplement (doi:10.1038/nm.4010), 2015-12-14
Supplement: 41591_2016_BFnm4010_MOESM36_ESM.pdf [file 41591_2016_BFnm4010_MOESM36_ESM.pdf]

## Supplementary Information

### Clearance of senescent cells by ABT263 rejuvenates aging hematopoietic stem cells in mice

Jianhui Chang, Yingying Wang, Lijian Shao, Remi–Martin Laberge, Marco Demaria, Judith Campisi, Krishnamurthy Janakiraman, Norman E. Sharpless, Sheng Ding, Wei Feng, Yi Luo, Xiaoyan Wang, Nukhet Aykin–Burns, Kimberly Krager, Usha Ponnappan, Martin Hauer–Jensen, Aimin Meng, and Daohong Zhou

| Supplementary Item & Number | Title                                                                                                                                |
|-----------------------------|--------------------------------------------------------------------------------------------------------------------------------------|
| Supplementary Figure 1      | Analysis of WI–38 cell senescence and effect of ABT263 on the viability of IR–induced senescent WI–38 cells in culture               |
| Supplementary Figure 2      | TBI induces SC accumulation in p16–3MR mice in a time dependent manner                                                               |
| Supplementary Figure 3      | Mechanism of action of ABT263                                                                                                        |
| Supplementary Figure 4      | TBI induces HSC senescence in mice                                                                                                   |
| Supplementary Figure 5      | Clearance of SCs by ABT263 does not reduce BM HSCs and HPCs in TBI mice                                                              |
| Supplementary Figure 6      | Clearance of SCs by ABT263 improves the engraftment ability of HSCs from TBI mice in secondary BMT recipients                        |
| Supplementary Figure 7      | Clearance of SCs by ABT263 attenuates TBI–induced disruption of HSC quiescence and sustained DNA damage in HSCs                      |
| Supplementary Figure 8      | Clearance of SCs by ABT263 promotes B cell lymphopoiesis in TBI mice                                                                 |
| Supplementary Figure 9      | ABT263 selectively eliminates TBI–induced senescent HSCs in culture and abrogates TBI–induced SASP in BM HSCs and bone stromal cells |

|                         |                                                                                                                     |
|-------------------------|---------------------------------------------------------------------------------------------------------------------|
| Supplementary Figure 10 | Clearance of SCs by ABT263 improves the clonogenic activity and engraftment ability of HSCs from normally aged mice |
| Supplementary Figure 11 | ABT263 reduces senescent MuSCs in normally aged mice                                                                |
| Supplementary Table 1   | EC <sub>50</sub> for various compounds against non-senescent and IR-induced senescent WI-38 cells                   |
| Supplementary Table 2   | Suppliers for various compounds and cytokines                                                                       |
| Supplementary Table 3   | Antibodies for western blot analyses                                                                                |
| Supplementary Table 4   | Antibodies for flow cytometry and cell sorting                                                                      |
| Supplementary Table 5   | Sequences of the primers used for qRT-PCR                                                                           |

**a**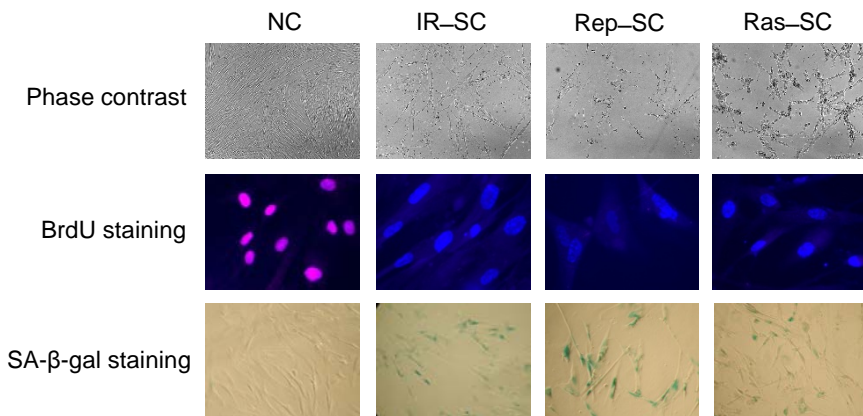**b**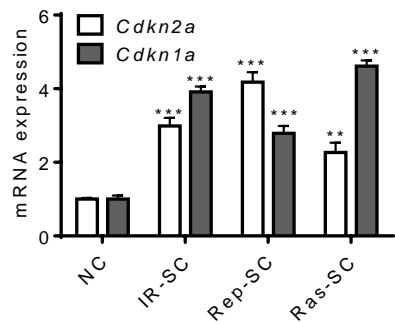**c**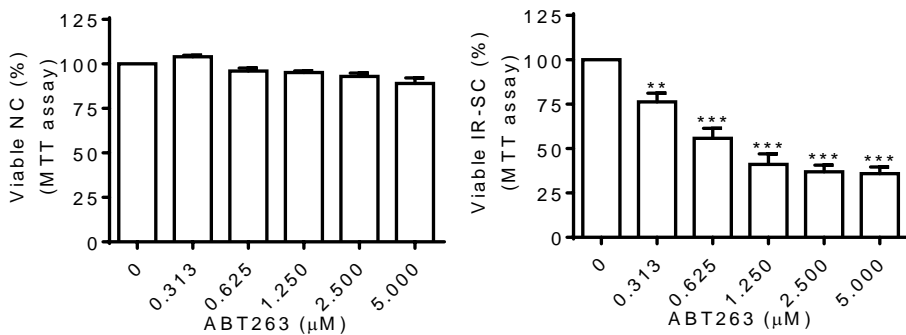**d**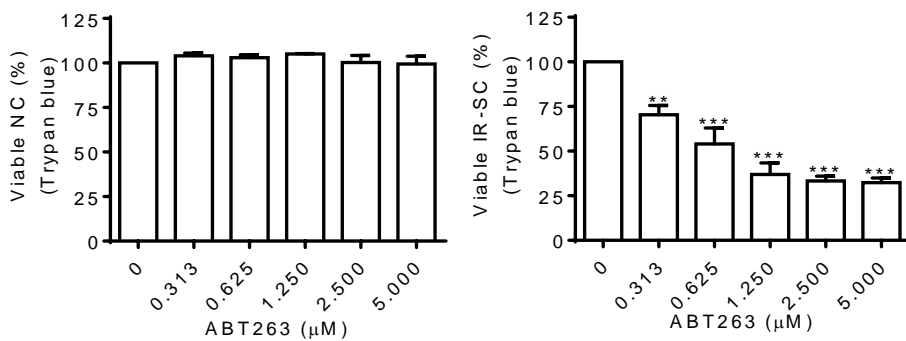**e**EC<sub>50</sub> values of ABT263

| Cell types | EC <sub>50</sub> ( $\mu\text{M}$ ) | EC <sub>50</sub> Ratio (NC / SC) |
|------------|------------------------------------|----------------------------------|
| NC         | 12.60                              | —                                |
| IR-SC      | 0.61                               | 20.66                            |
| Rep-SC     | 1.45                               | 8.69                             |
| Ras-SC     | 0.62                               | 20.32                            |

**Supplementary Figure 1 Analysis of WI-38 cell senescence and effect of ABT263 on the viability of IR-induced senescent WI-38 cells in culture.** (a) Representative phase contrast, BrdU staining and SA- $\beta$ -gal staining micrographs of non-senescent (NC) and senescent WI-38 cells induced by IR (IR-SC), replicative exhaustion (Rep-SC) or expression of oncogenic Ras (Ras-SC). (b) IR-SC, Rep-SC and Ras-SC express increased levels of *Cdkn2a* and *Cdkn1a* mRNA compared to NC. The data are presented as means  $\pm$  s.e.m. of fold changes from 3 independent experiments.  $**P < 0.01$  and  $***P < 0.001$  vs. NC by unpaired t test. (c) MTT assay and (d) trypan blue exclusion test confirm that ABT263 dose-dependently kills senescent WI-38 fibroblasts (WI38) induced by ionizing radiation (IR-SC), but is not cytotoxic to non-senescent WI-38 cells (NC). Viable cells were quantified after treating with increasing concentrations of ABT263 for 72 h. The data presented are means  $\pm$  s.e.m. of viable cells as a percent of control without ABT263 treatment from 3 or more independent experiments.  $**P < 0.01$  and  $***P < 0.001$ , vs. without ABT263 by one-way ANOVA. (e) EC<sub>50</sub> values of ABT263 against NC and SC.

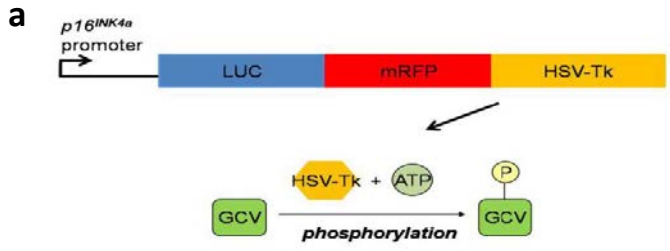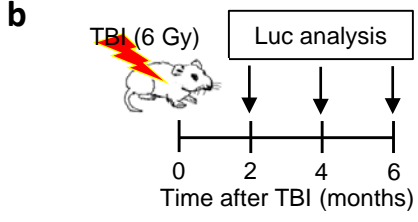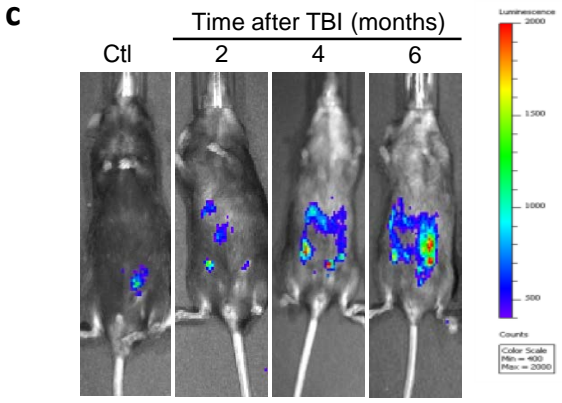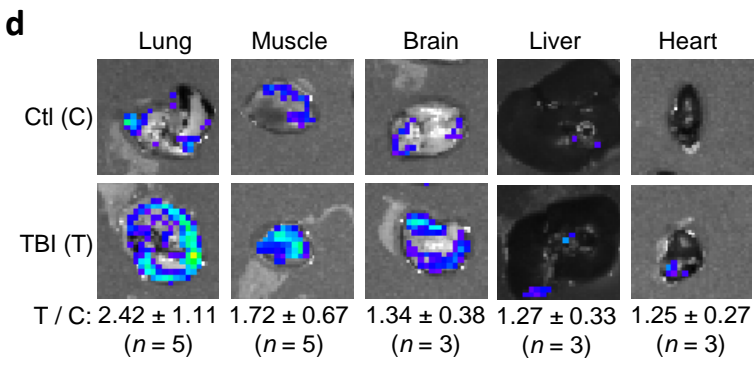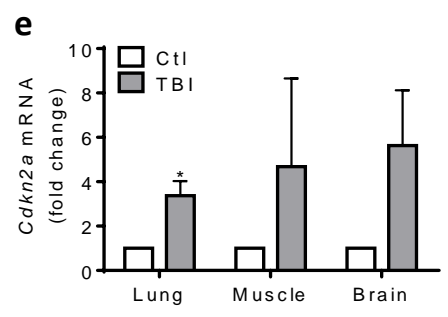

**Supplementary Figure 2 TBI induces SC accumulation in p16–3MR mice in a time dependent manner.** (a) A diagram depicting the p16–3MR transgene. (b) A diagram illustrating the experimental design. Specifically, male p16–3MR mice were exposed to a sublethal dose (6 Gy) of TBI at 2 months of age. Before (Ctl) and 2, 4, and 6 months after TBI, whole body luminescence was quantified. The mice were euthanized the day after the last imaging to harvest tissues for luminescence quantification and analysis of *Cdkn2a* mRNA levels by qRT–PCR. (c) Whole body luminescence imaging shows that TBI induces SC accumulation in p16–3MR mice in a time dependent manner. Left panel: representative luminescent images of control (Ctl) and TBI p16–3MR mice (TBI); and right panel: whole body luminescence quantification. (d) Representative luminescent images of the lungs, skeletal muscle, brain, liver and heart from control (Ctl) and TBI p16–3MR mice. The numbers below the images are means  $\pm$  s.e.m. of fold changes of luminescence in various tissues compared to that of Ctl. (e) Analysis of *Cdkn2a* mRNA levels in the lungs, skeletal muscle, and brain confirms that TBI increases SCs in these tissues. The data are presented as means  $\pm$  s.e.m. of fold changes from Ctl ( $n = 3$  mice/group). \* $P < 0.05$  vs. Ctl. One–way ANOVA for c and unpaired t test for e.

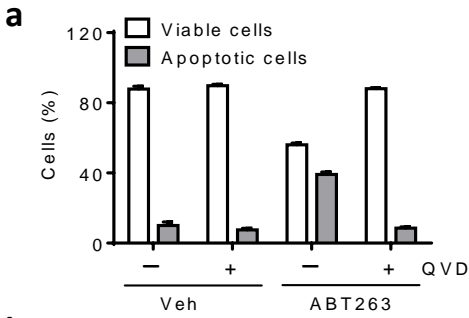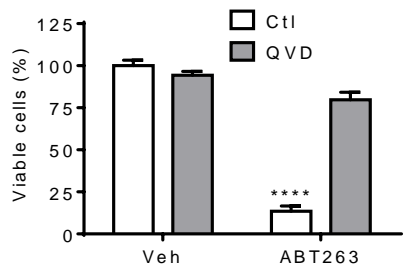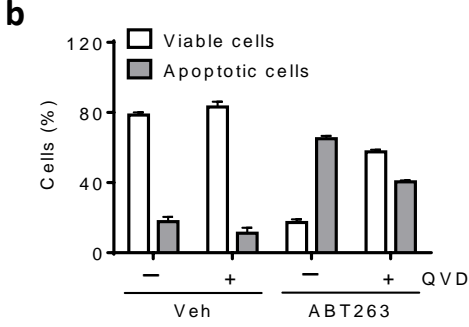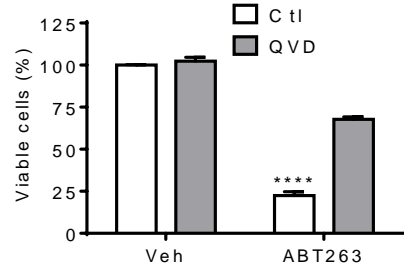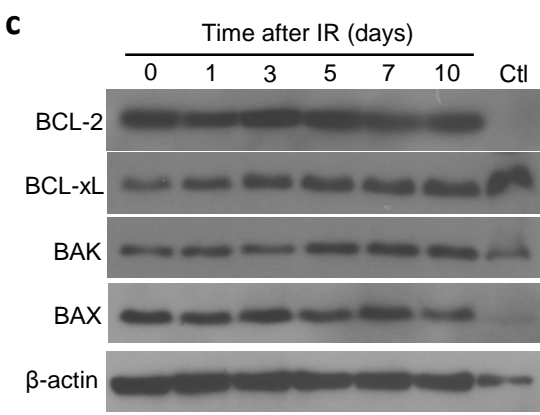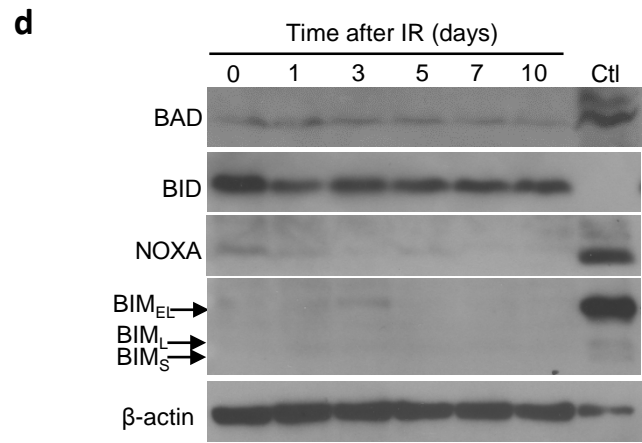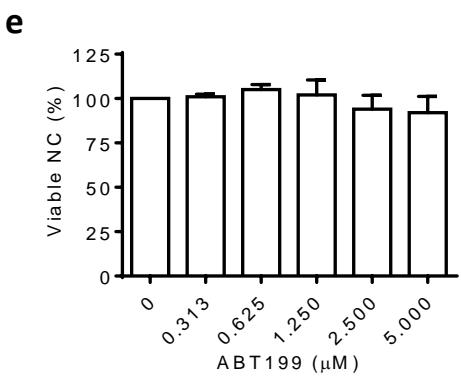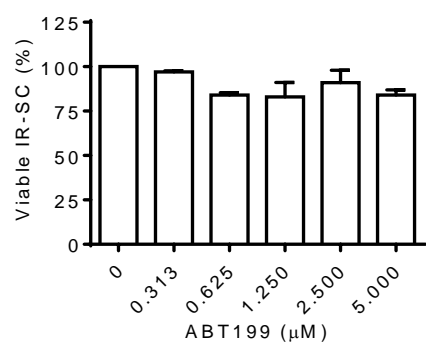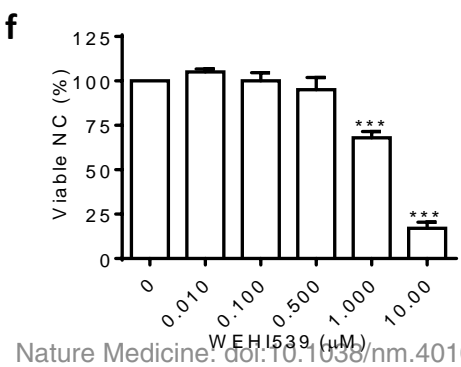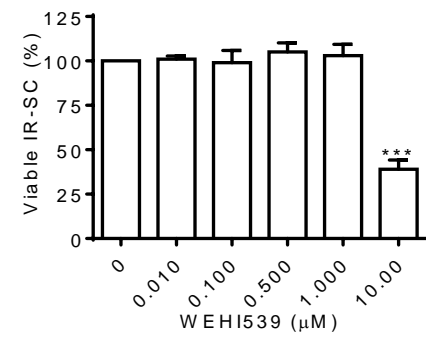

**Supplementary Figure 3 Mechanism of action of ABT263.** (a & b) ABT263 induces apoptosis in IR-induced senescent IMR-90 fibroblasts (a) and human renal epithelial cells (b) in a caspase-dependent manner as shown in Fig. 2a for WI-38 cells. Left panel: percentages of viable cells (PI<sup>-</sup>Annexin V<sup>-</sup> cells) and apoptotic cells (PI<sup>-</sup>Annexin V<sup>+</sup> cells + PI<sup>+</sup>Annexin V<sup>+</sup> cells) 24 h after treatment with vehicle or ABT263 ± QVD. Right panel: Quantification of the percentage of viable IR-SC 72 h after treatment with vehicle or ABT263 ± QVD. The data are presented as means ± s.e.m. of 3 independent experiments. \*\*\*\**P* < 0.0001 vs. Ctl by two-way ANOVA. (c & d) A representative western blot of BCL-2, BCL-xL, BAK and BAX in WI-38 cells at various times after exposure to 10 Gy IR is shown in c and that of BAD, BID, NOXA, and BIM in d. β-actin is used as a loading control. Ctl represents a positive control using cell lysates from K562 cells treated with 2 μM MG132 for 24 h. (e & f) Inhibition of Bcl-2 or Bcl-xL alone does not selectively kill senescent WI-38 cells. (e) ABT199 (a specific Bcl-2 inhibitor) is not cytotoxic to senescent WI-38 cells induced by ionizing radiation (IR-SC) or non-senescent WI-38 cells (NC). (f) WEHI539 (a specific Bcl-xL inhibitor) does not selectively kill IR-SC. Viable cells were quantified after treatment with increasing concentrations of ABT199 or WEHI593 for 72 h. The data presented are means ± s.e.m. of viable cells as a percent of control without ABT199 or WEHI593 treatment from 3 independent experiments. \*\*\**P* < 0.001 vs. without ABT199 or WEHI593 by one-way ANOVA.



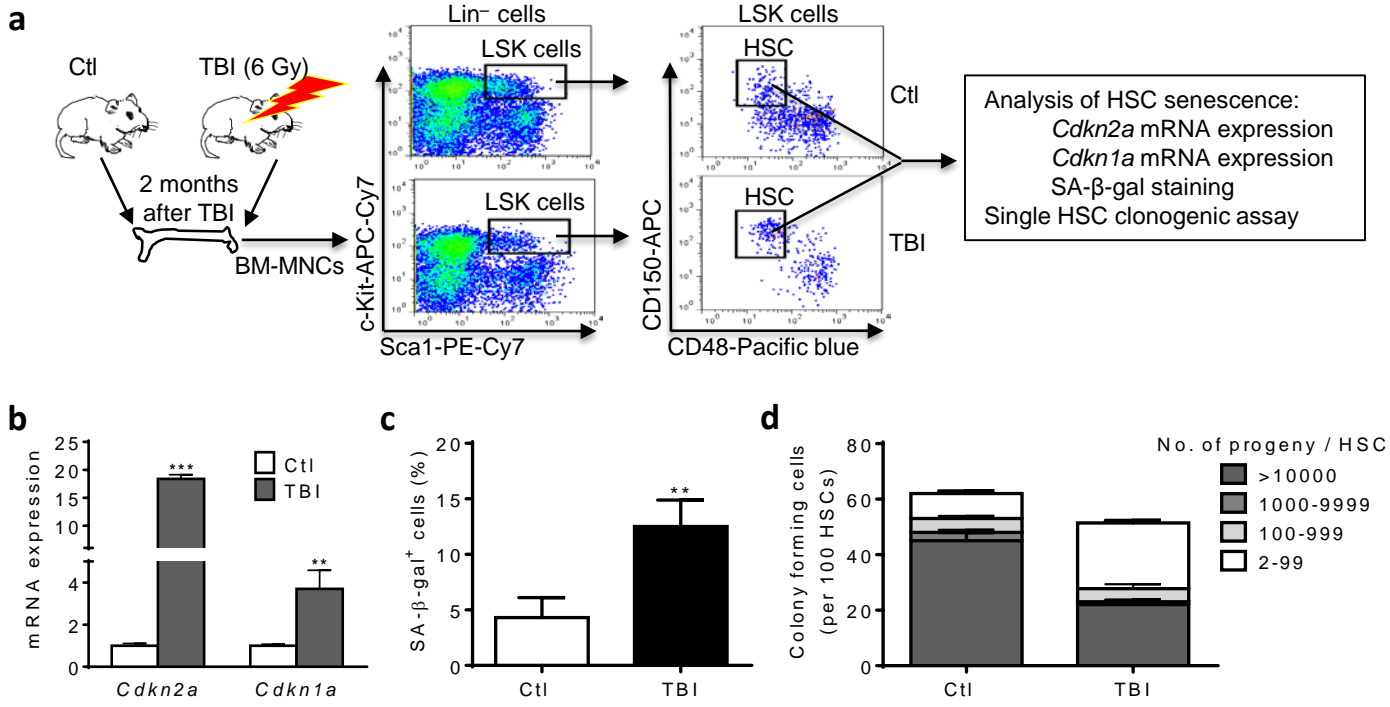

**Supplementary Figure 4 TBI induces HSC senescence in mice.** (a) A diagram illustrating the strategy to isolate mouse bone marrow (BM) HSCs (CD150<sup>+</sup>CD48<sup>-</sup>LSK cells) from control non-irradiated mice (Ctl) and sublethally total body irradiated (TBI) mice for analysis of HSC senescence and single HSC clonogenic activity. (b & c) HSCs from TBI mice express higher levels of *Cdkn2a* and *Cdkn1a* mRNA and SA- $\beta$ -gal activity than cells from control non-irradiated mice (Ctl). The data are presented as means  $\pm$  s.e.m. of fold changes from 3 independent experiments for b and means  $\pm$  s.e.m. of percent of SA- $\beta$ -gal<sup>+</sup> cells from 4 Ctl mice and 3 TBI mice for c. \*\* $P < 0.01$  and \*\*\* $P < 0.001$  vs. Ctl by unpaired t test. (d) Clonogenic activity was determined after individual BM HSCs were cultured at 1 cell/well in HSC expansion medium for 14 d. The data presented in c are means  $\pm$  s.e.m. of percent of single HSCs having the ability to produce different numbers of progeny ( $n = 2$  independent experiments with pooled HSCs from 3–4 mice per group).

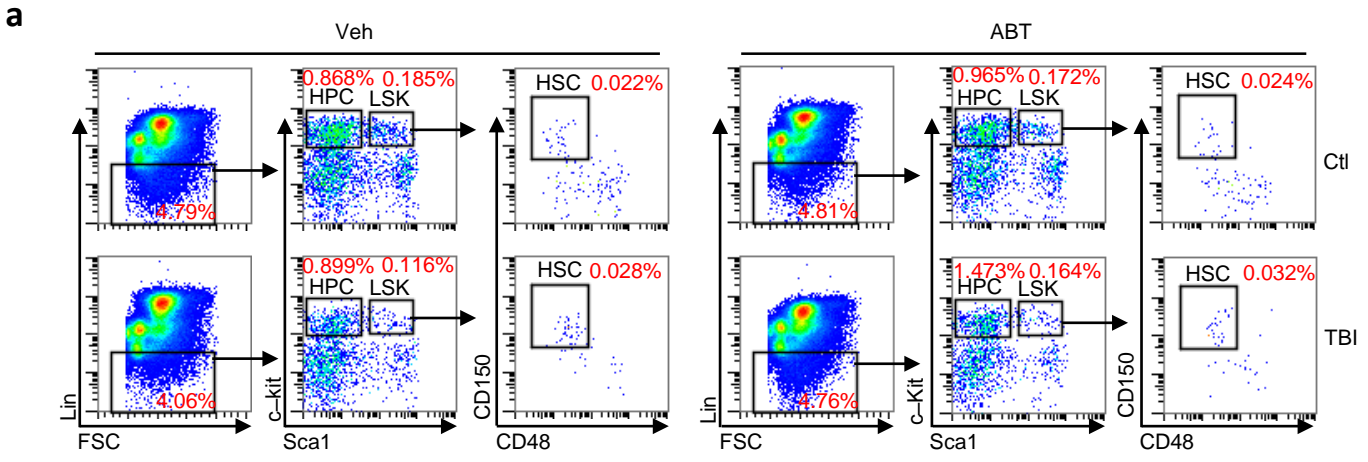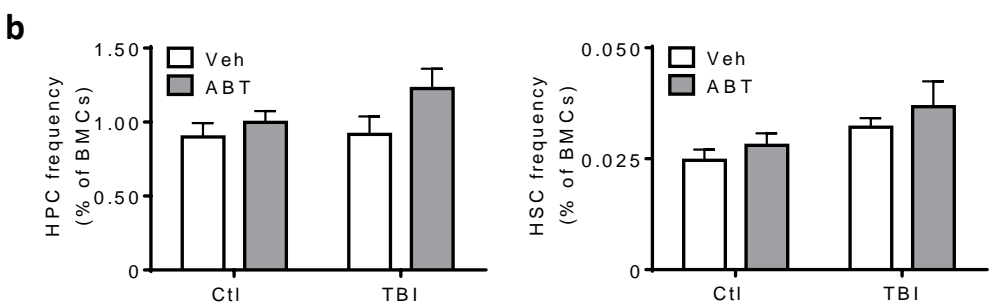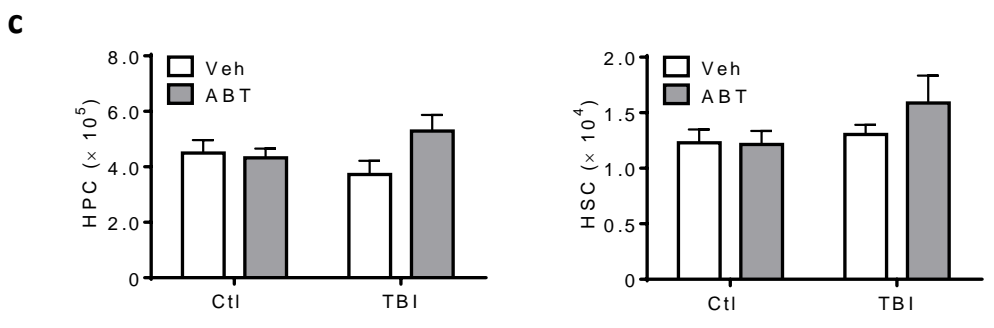

**Supplementary Figure 5 Clearance of SCs by ABT263 does not reduce BM HSCs and HPCs in TBI mice.** (a) Representative flow cytometric analyses of HSCs and HPCs (Lin<sup>-</sup>Sca1<sup>-</sup>c-kit<sup>+</sup> cells) in BM cells (BMCs) from control (Ctl) or TBI mice after treatment with vehicle (Veh) or ABT263 (ABT) as shown in **Fig. 3a**. (b) The frequencies of HPCs and HSCs in BMCs. (c) The numbers of HPCs and HSCs in the hind legs from each mouse. The data are presented as means  $\pm$  s.e.m. ( $n = 8 - 11$  mice per group).

a

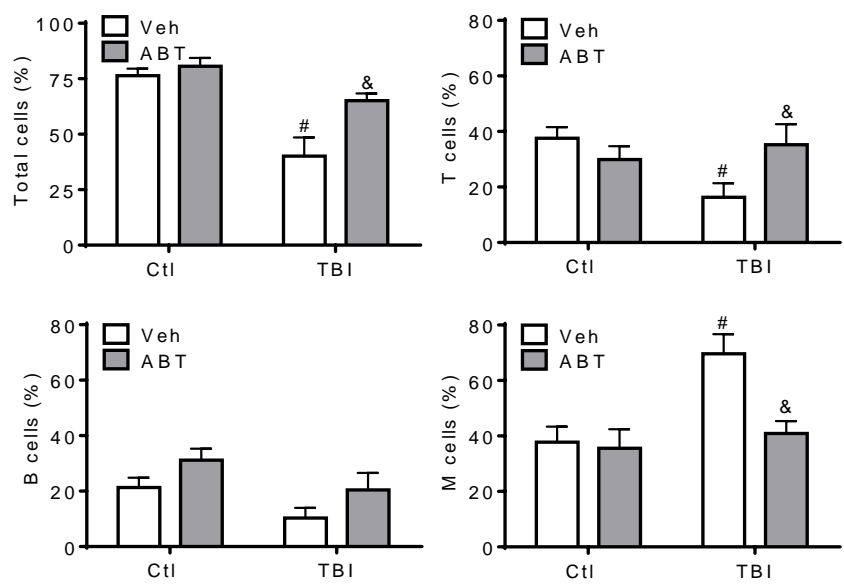

**Supplementary Figure 6 Clearance of SCs by ABT263 improves the engraftment ability of HSCs from TBI mice in secondary BM transplantation (BMT) recipients.** BMT was done as shown in **Fig. 3d**. The engraftment of donor-derived total white blood cells (CD45.2<sup>+</sup>), T cells (CD45.2<sup>+</sup>Thy-1.2<sup>+</sup>), B cells (CD45.2<sup>+</sup>B220<sup>+</sup>), and myeloid cells (M cells, CD45.2<sup>+</sup>CD11b/Gr-1<sup>+</sup>) in secondary recipient peripheral blood is shown. The data are presented as means  $\pm$  s.e.m. ( $n = 6$  recipients per group). <sup>#</sup> $P < 0.05$  vs. Ctl and <sup>&</sup> $P < 0.05$  vs. TBI + Veh by two-way ANOVA.

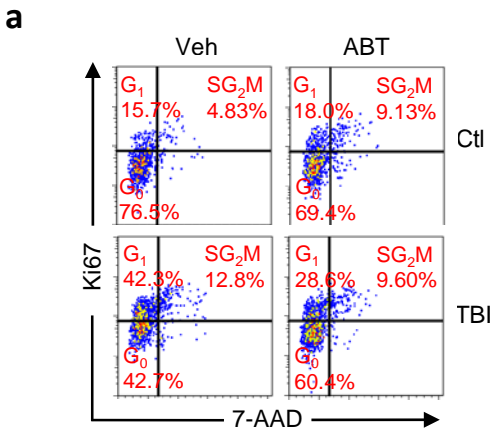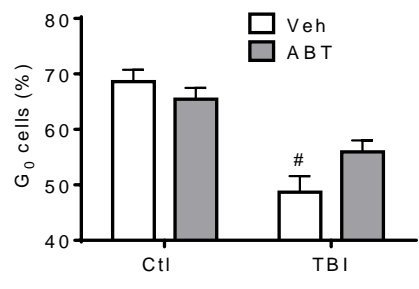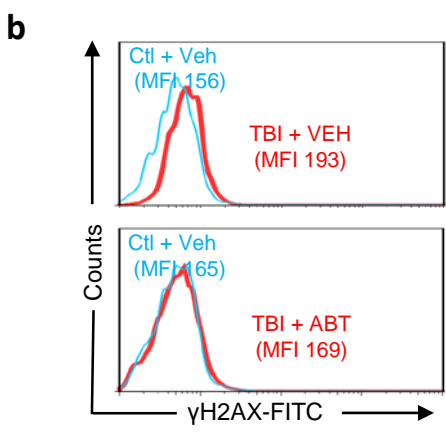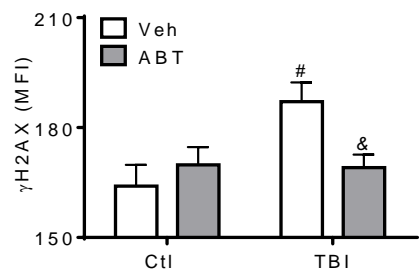

**Supplementary Figure 7 Clearance of SCs by ABT263 attenuates TBI-induced disruption of HSC quiescence and sustained DNA damage in HSCs.** (a) Left panel, representative flow cytometric analyses of the cell cycle distribution of HSCs from control (Ctl) or TBI mice after treatment with vehicle (Veh) or ABT263 (ABT). Right panel, the percentages of G<sub>0</sub> cells in HSCs (Ki67<sup>-</sup> cells). (b) Left panel, representative flow cytometric analyses of  $\gamma$ H2AX staining to detect DNA double strand breaks in HSCs from control (Ctl) or TBI mice after treatment with vehicle (Veh) or ABT263 (ABT). Right panel, the mean fluorescence intensity (MFI) of  $\gamma$ H2AX staining in HSCs. The data are presented as means  $\pm$  s.e.m. ( $n = 8 - 11$  mice per group for a and 5–11 mice per group for b). #P < 0.05 vs. Ctl and &P < 0.05 vs. TBI + Veh by two-way ANOVA.



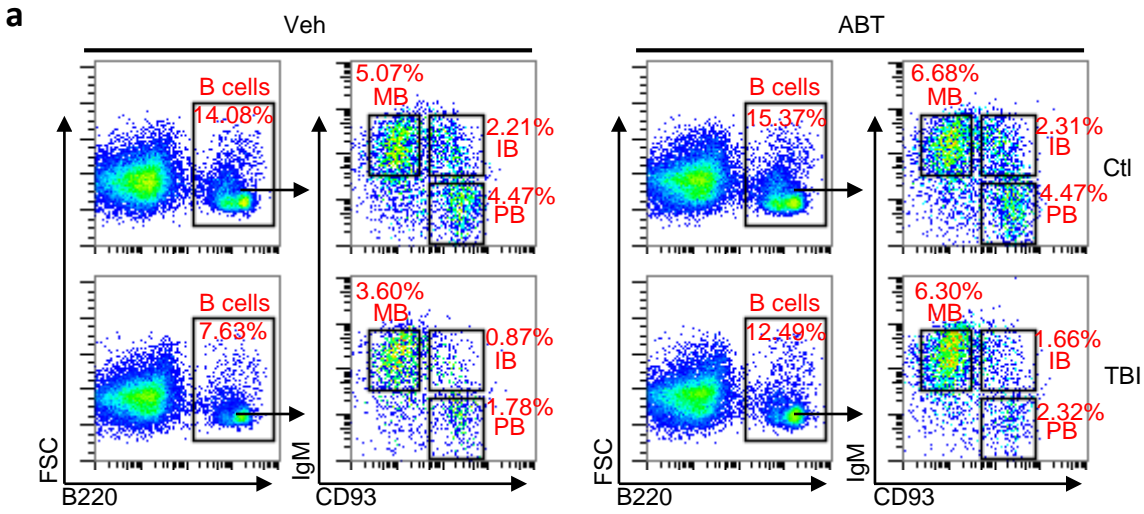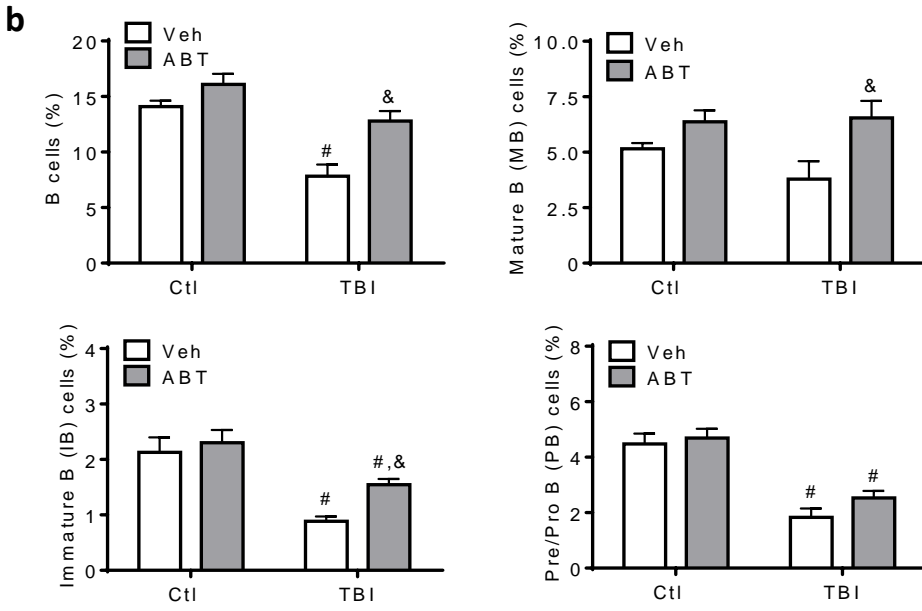

**Supplementary Figure 8 Clearance of SCs by ABT263 promotes B cell lymphopoiesis in TBI mice.** (a) Representative flow cytometric analyses of B cells (B220<sup>+</sup>), mature B cells (MB, B220<sup>+</sup>IgM<sup>+</sup>CD93<sup>-</sup>), immature B cells (IB, B220<sup>+</sup>IgM<sup>+</sup>CD93<sup>+</sup>), and Pre/Pro-B cells (PB, B220<sup>+</sup>IgM<sup>-</sup>CD93<sup>+</sup>) in BMCs from control (Ctl) or TBI mice after treatment with vehicle (Veh) or ABT263 (ABT) as shown in **Fig. 3a**. (b) The frequencies of B cells, mature B cells, immature B cells, and Pre-Pro-B cells in BMCs are presented as means  $\pm$  s.e.m. ( $n = 4 - 6$  mice per group). <sup>#</sup>P < 0.05 vs. Ctl and <sup>&</sup>P < 0.05 vs. TBI + Veh by two-way ANOVA.

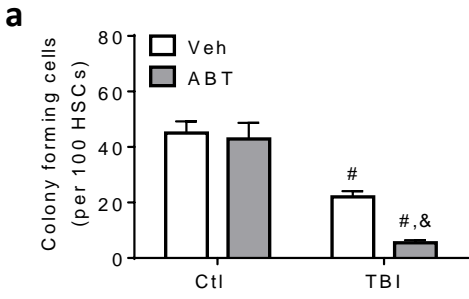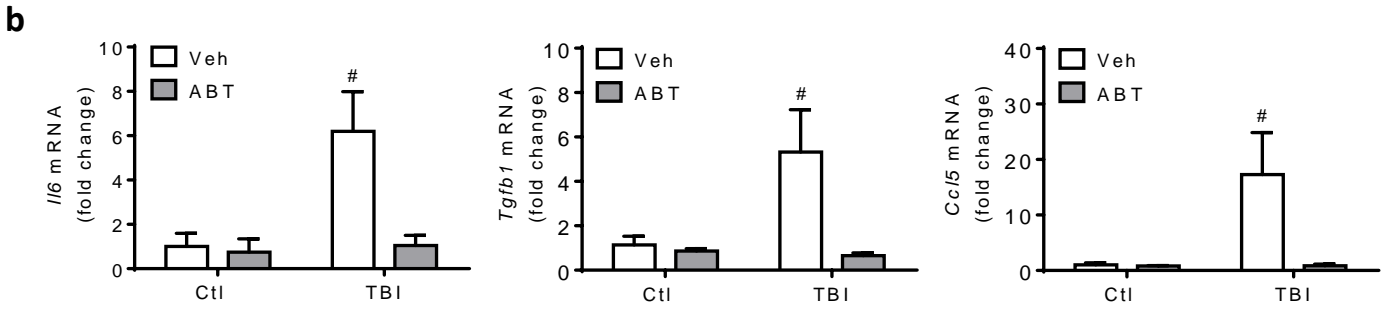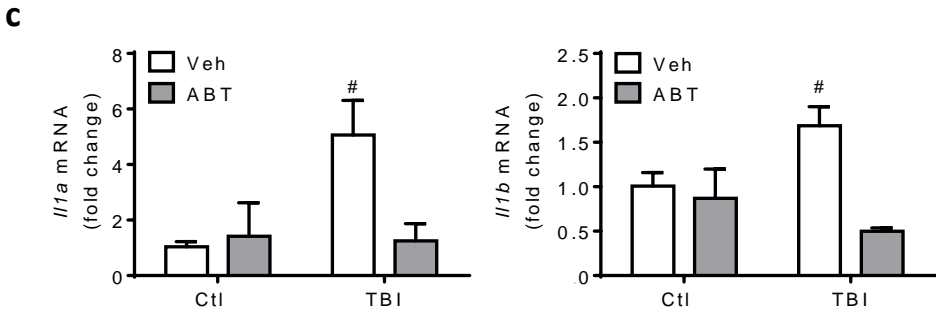

**Supplementary Figure 9 ABT263 selectively eliminates TBI-induced senescent HSCs in culture and abrogates TBI-induced SASP in BM HSCs and bone stromal cells.** (a) ABT263 selectively eliminates TBI-induced senescent HSCs in culture. Colony forming activity of single HSCs isolated from control non-irradiated mice (Ctl) or mice 2 months after exposure to 6 Gy TBI was analyzed in the presence of vehicle (Veh) or ABT263 (ABT, 1.25  $\mu$ M). The data are presented as means  $\pm$  s.e.m ( $n = 3$  independent assays) of HSCs that were capable of producing more than 10,000 progeny. (b and c) ABT263 inhibits TBI-induced SASP in HSCs and bone stromal cells. BM HSCs and bone stromal cells were isolated from control non-irradiated mice (Ctl) or TBI mice treated with vehicle (Veh) or ABT263 (ABT) as shown in **Fig. 3a** and analyzed for SASP mRNA levels by qPCR. (b) Levels of *Il6*, *Tgfb1* and *Ccl5* mRNAs in HSCs. (c) Levels of *Il1a* and *Il1b* mRNAs in bone stromal cells. Levels of *Il1a*, *Il1b*, *Tnfa*, and *Cxcl10* mRNA in HSCs and those of *Il6*, *Tgfb1*, *Tnfa*, *Ccl5* and *Cxcl10* mRNA in bone stromal cells were not elevated by TBI (data not shown). The data presented in **b** and **c** are means  $\pm$  s.e.m. of fold changes from vehicle-treated control mice.  $n = 3$  mice/group for Ctl and 5 mice/group for TBI. <sup>#</sup>P < 0.05 vs. Ctl and <sup>&</sup>P < 0.05 vs. TBI + Veh by two-way ANOVA.

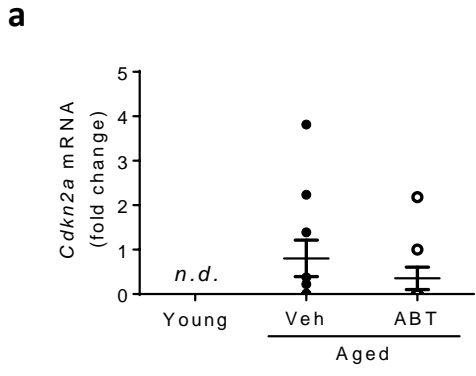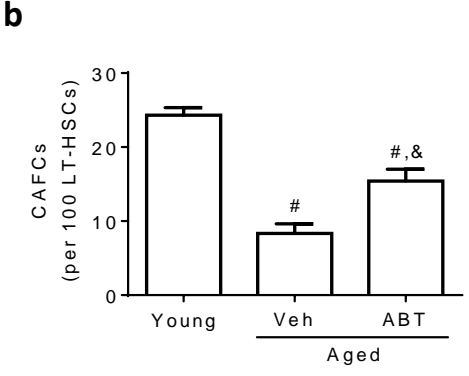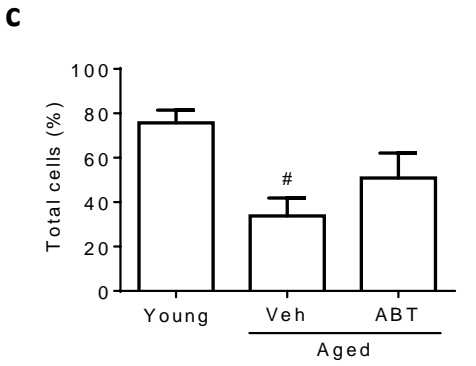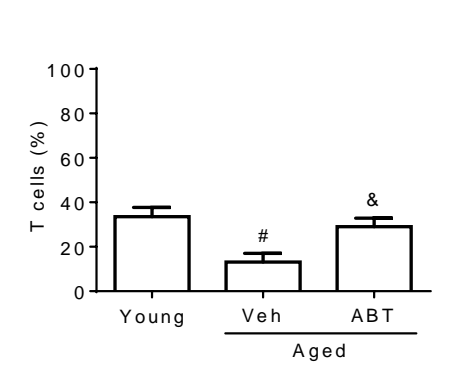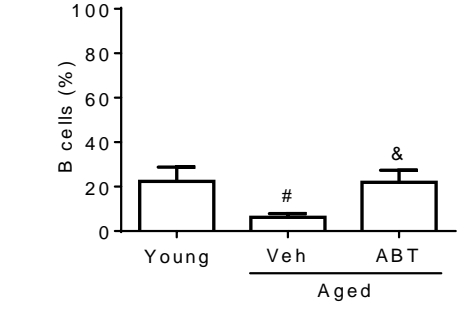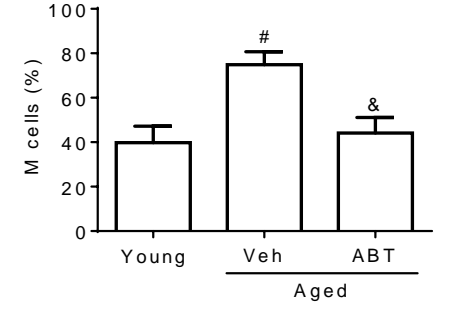

**Supplementary Figure 10 Clearance of SCs by ABT263 improves the clonogenic activity and engraftment ability of HSCs from normally aged mice.** (a) The expression of *Cdkn2a* mRNA in BM HSCs was analyzed by qPCR and presented as fold changes from aged mice treated with vehicle. *n.d.*, not detectable.  $n = 9, 10,$  and  $11$  mice/group for Young, Aged + Veh, and Aged + ABT, respectively. (b) Single HSC CAFC assay shows that ABT263 improves clonogenic function of HSCs from aged mice.  $n = 7, 11,$  and  $10$  mice/group for Young, Aged + Veh, and Aged + ABT, respectively. (c) Engraftment of donor-derived total white blood cells (CD45.2<sup>+</sup>), T cells (CD45.2<sup>+</sup>Thy-1.2<sup>+</sup>), B cells (CD45.2<sup>+</sup>B220<sup>+</sup>), and myeloid cells (M cells, CD45.2<sup>+</sup>CD11b/Gr-1<sup>+</sup>) in secondary recipients' peripheral blood is shown. The data are presented as means  $\pm$  s.e.m. ( $n = 6, 10,$  and  $6$  recipients per group for Young, Aged + Veh, and Aged + ABT, respectively). # $P < 0.05$  vs. Young and & $P < 0.05$  vs. Aged + Veh by two-way ANOVA.

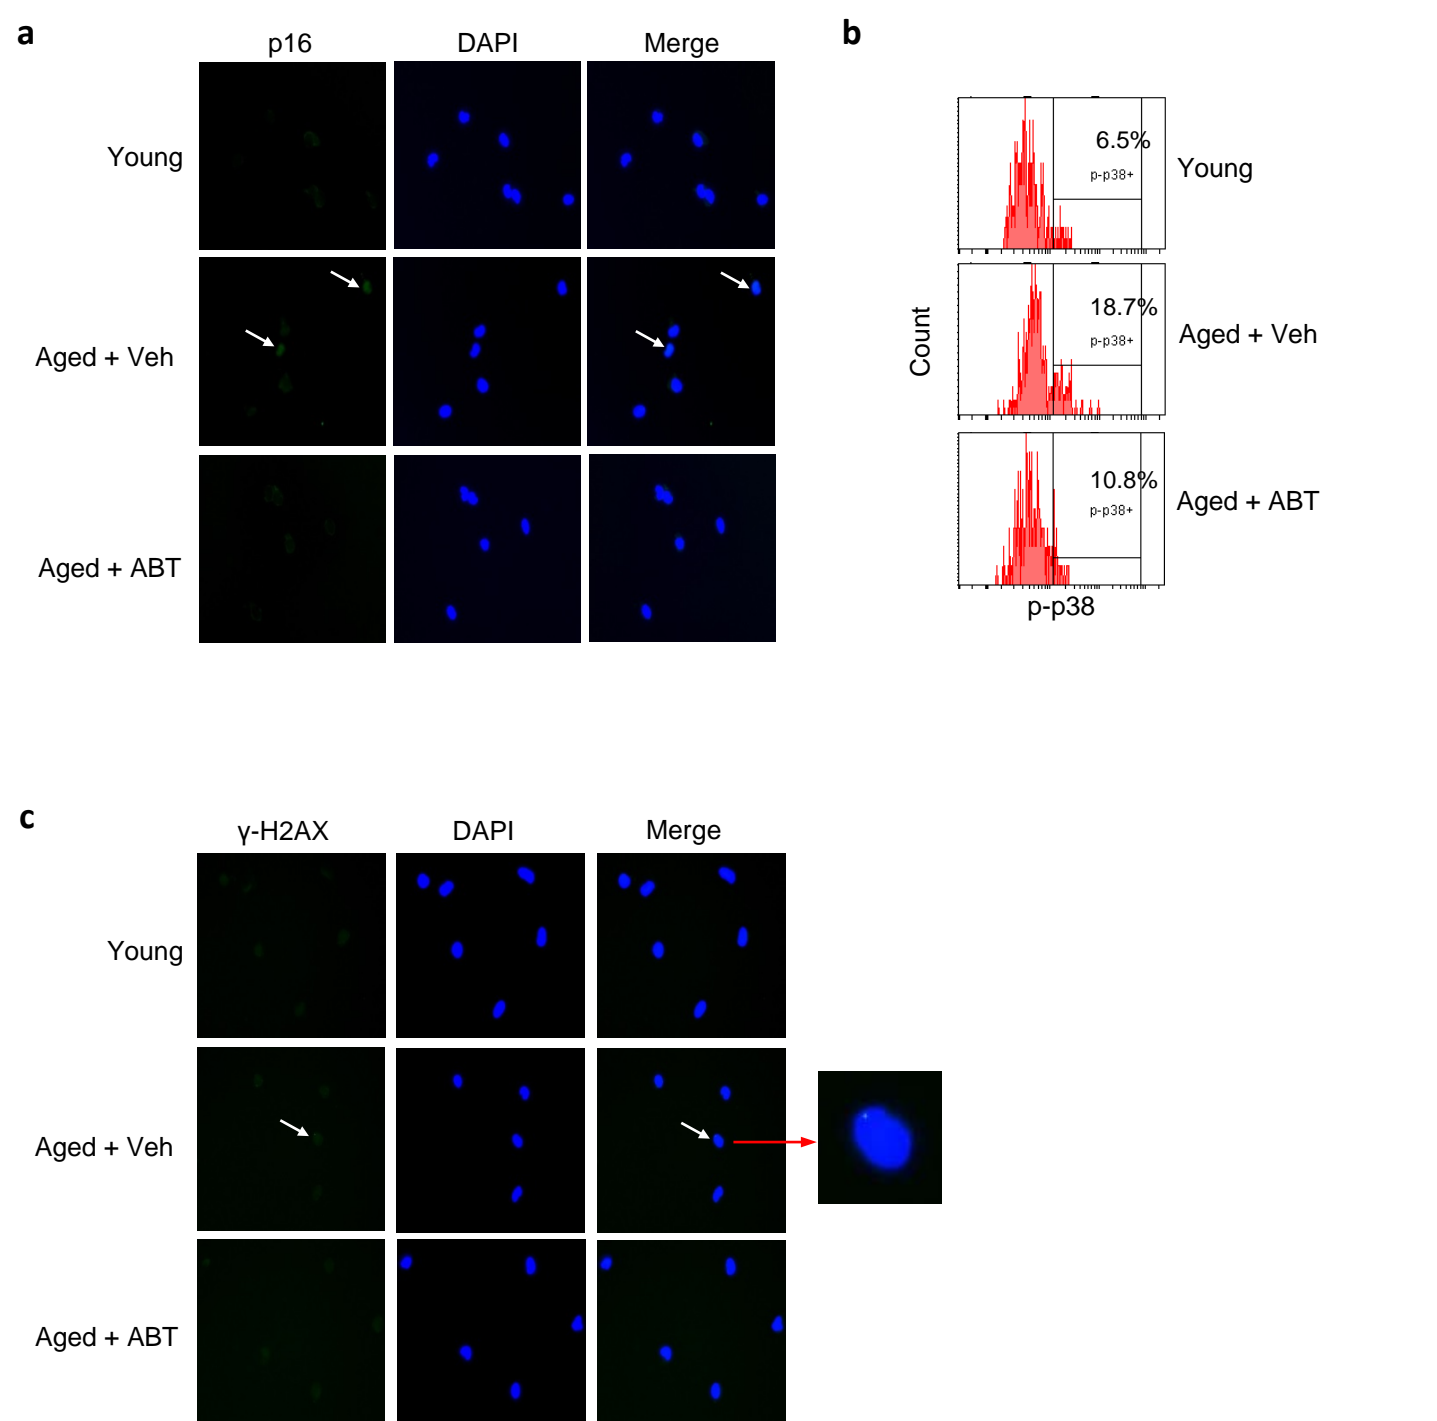

**Supplementary Figure 11. ABT263 reduces senescent MuSCs in normally aged mice.** (a) Representative micrograph of p16 immunostaining of sorted MuSCs from young and aged mice treated with vehicle (Veh) or ABT263 (ABT). White arrows indicate p16<sup>+</sup> senescent MuSCs. (b) Representative flow cytometric analysis of phosphorylated p38 (p-p38) immunostaining in MuSCs from young and aged mice treated with vehicle (Veh) or ABT263 (ABT). (c) Representative micrograph images of  $\gamma$ H2AX immunostaining of the sorted MuSCs from young and aged mice treated with vehicle (Veh) or ABT263 (ABT). White arrows indicate a MuSC with a  $\gamma$ H2AX focus.



**Supplementary Table 1. EC<sub>50</sub> for compounds administered to non-senescent WI-38 cells (NC) and IR-induced senescent WI-38 cells (SC)**

| Compound name              | Mechanism(s) of action         | EC <sub>50</sub> (μM), non-senescent cells (NC) | EC <sub>50</sub> (μM), senescent cells (SC) | EC <sub>50</sub> Ratio (NC/SC) |
|----------------------------|--------------------------------|-------------------------------------------------|---------------------------------------------|--------------------------------|
| ABT263                     | Bcl-2, Bcl-xL, Bcl-w inhibitor | 12.60                                           | 0.61                                        | 20.6                           |
| ABT199                     | Bcl-2 inhibitor                | > 10.00                                         | > 10.00                                     | 1.0                            |
| WEHI539                    | Bcl-xL inhibitor               | 2.80                                            | 3.88                                        | 0.7                            |
| MIM1                       | Mcl-1 inhibitor                | > 50.00                                         | > 50.00                                     | 1.0                            |
| 2-Deoxy-D-glucose          | Glycolysis inhibitor           | 4800.00                                         | 8890.00                                     | 0.5                            |
| 3-Bromopyruvate            | Glycolysis and TCA inhibitor   | 280.00                                          | 370.00                                      | 0.8                            |
| Auranofin                  | TrxR inhibitor                 | 5.13                                            | 5.34                                        | 1.0                            |
| Buthionine sulfoximine     | γ-GSC inhibitor                | 2340.19                                         | 2391.51                                     | 1.0                            |
| Decyl-triphenylphosphonium | ROS inducer                    | 1.41                                            | 0.98                                        | 1.4                            |
| Arsenic trioxide           | ROS inducer                    | 15.65                                           | 18.26                                       | 0.9                            |
| Dehydroepiandrosterone     | PPP inhibitor                  | 296.20                                          | 509.51                                      | 0.6                            |
| Rapamycin <sup>a</sup>     | mTOR inhibitor                 | > 0.04                                          | > 0.04                                      | 1.0                            |
| Metformin <sup>a</sup>     | AMPK activator                 | > 20,000                                        | > 20,000                                    | 1.0                            |
| Psychosine                 | Lysosome toxin                 | 46.32                                           | 52.25                                       | 0.9                            |
| Balifomycin A1             | (V)-ATPase inhibitor           | 29.71                                           | 22.11                                       | 1.3                            |
| Despramine                 | ASM inhibitor                  | 50.03                                           | 51.13                                       | 1.0                            |
| Terfenadine                | ASM inhibitor                  | 6.13                                            | 6.87                                        | 0.9                            |
| Nutlin3 <sup>b</sup>       | Mdm2 inhibitor                 | 5.62                                            | 82.16                                       | 0.1                            |
| KU55933                    | ATM inhibitor                  | 5.10                                            | 30.73                                       | 0.2                            |
| NU7026                     | DNA-PK inhibitor               | 47.02                                           | 64.03                                       | 0.7                            |
| SB202190 <sup>c</sup>      | p38 MAPK inhibitor             | > 800.00                                        | > 800.00                                    | 1.0                            |
| Parthenolide <sup>d</sup>  | NF-κB inhibitor                | 11.46                                           | 12.57                                       | 0.9                            |
| BMS345541 <sup>d</sup>     | IKKβ inhibitor                 | 6.87                                            | 10.79                                       | 0.6                            |
| JQ1                        | BRDT / c-Myc inhibitor         | 0.12                                            | 1.93                                        | 0.1                            |
| MG132                      | Proteasome inhibitor           | 0.24                                            | 1.92                                        | 0.1                            |
| IPI-504                    | HSP 90 inhibitor               | 0.14                                            | 0.93                                        | 0.2                            |

|                                  |                                                         |          |          |       |
|----------------------------------|---------------------------------------------------------|----------|----------|-------|
| Echinomycin                      | HIF1 $\alpha$ inhibitor                                 | 0.42     | 2.86     | 0.2   |
| CPI-613                          | PDH and $\alpha$ -ketoglutarate dehydrogenase inhibitor | 222.92   | 205.20   | 1.1   |
| Plumbagin                        | Anti-cancer agent, ROS producer                         | 12.63    | 8.70     | 1.5   |
| Bortezomib                       | 26S proteasome inhibitor                                | 0.016    | 0.024    | 0.7   |
| Wogonin                          | Anti-cancer agent, ROS producer                         | > 200.00 | > 200.00 | 1.0   |
| Phenethyl isothiocyanate (PEITC) | ROS producer, Akt inactivator, JNK activator            | < 10.00  | > 10.00  | < 1.0 |
| Spermine                         | Polyamine                                               | > 40.00  | > 40.00  | 1.0   |
| YM-155                           | Survivin inhibitor                                      | 78.43    | 50.02    | 1.6   |
| Hydrogen peroxide                | ROS                                                     | 134.80   | 230.70   | 0.58  |
| Trichostatin A (TSA)             | HDAC inhibitor                                          | 0.72     | 0.39     | 1.87  |
| Vorinostat (SAHA)                | HDAC inhibitor                                          | 0.85     | 2.21     | 0.38  |

AMPK: AMP-activated protein kinase; ASM: Acid sphingomyelinase; ATM: Ataxia telangiectasia mutated; BRDT: Bromodomain testis-specific protein; DNA-PK: DNA-dependent protein kinase;  $\gamma$ -GSC:  $\gamma$ -glutamylcysteine synthetase; HDAC: Histone deacetylase; HIF1 $\alpha$ : hypoxia inducible factor 1 $\alpha$ ; HSP 90: Heat-shock protein 90; IKK $\beta$ : I $\kappa$ B kinase  $\beta$ ; JNK: Jun N-terminal kinase; MAPK: Mitogen-activated protein kinase; PDH: Pyruvate dehydrogenase; PPP: Pentose phosphate pathway; TCA: Citric acid cycle; TrxR: Thioredoxin reductase;

#### Footnotes:

<sup>a</sup>Rapamycin and metformin can inhibit the mTOR pathway directly and indirectly via activation of the LKB1/AMPK pathway, respectively. The mTOR pathway is important in regulation of cellular senescence (Blagosklonny MV. *Drug Discov Today*. 2007;12:218–24).

<sup>b</sup>Nutlin3 promotes the induction of cellular senescence by activating the p53 pathway (Schug TT. *Aging* (Albany NY). 2009;1:842–4).

<sup>c</sup>SB202190 inhibits the p38 pathway that is important for the induction of cellular senescence (Xu Y et al. *Trends Biochem Sci*. 2014;39:268–76).

<sup>d</sup>Both parthenolide and BMS345541 inhibit the IKK-NF $\kappa$ B pathway and NF $\kappa$ B inhibition can delay DNA-damage-induced senescence (Tilstra JS et al. *J Clin Invest*. 2012;122:2601–12).

**Supplementary Table 2. Suppliers for compounds and cytokines**

| <b>Compound name</b>       | <b>Suppliers</b>                           | <b>Catalog #</b> |
|----------------------------|--------------------------------------------|------------------|
| ABT263                     | Selleckchem, Houston, TX,USA               | S1001            |
| ABT199                     | Selleckchem, Houston, TX,USA               | S8048            |
| WEHI539                    | APExBIO , Houston, TX,USA                  | A3935            |
| MIM1                       | APExBIO, Houston, TX,USA                   | A4465            |
| 2-Deoxy-D-glucose          | provided by Dr. Arkin-Burns*               |                  |
| 3-bromopyruvate            | Sigma, St. Louis, MO, USA                  | 16490            |
| Auranofin                  | provided by Dr. Spitz**                    |                  |
| Buthionine sulfoximine     | Sigma, St. Louis, MO, USA                  | B2515            |
| Decyl-triphenylphosphonium | provided by Dr. Spitz**                    |                  |
| Arsenic trioxide           | Sigma, St. Louis, MO, USA                  | A1010            |
| Dehydroepiandrosterone     | Selleckchem, Houston, TX,USA               | S2604            |
| Rapamycin                  | LC Laboratories, Woburn, MA,USA            | R-5000           |
| Metformin                  | Sigma, St. Louis, MO, USA                  | PHR1084          |
| Psychosine                 | Sigma, St. Louis, MO, USA                  | P9256            |
| Balifomycin A1             | Cayman, Ann Arbor, MI, USA                 | 11038            |
| Despramine                 | Sigma, St. Louis, MO, USA                  | D3900            |
| Terfenadine                | Sigma, St. Louis, MO, USA                  | T9652            |
| Nutlin3                    | Selleckchem, Houston, TX,USA               | S1061            |
| KU55933                    | Selleckchem, Houston, TX,USA               | S1092            |
| NU7026                     | Selleckchem, Houston, TX,USA               | S2839            |
| SB202190                   | EMD Millipore, Billerica, MA, USA          | 559388           |
| Parthenolide               | Santa Cruz, Dallas, Texas, USA.            | SC-3523          |
| BMS345541                  | Sigma, St. Louis, MO, USA                  | B9935            |
| JQ1                        | Cayman, Ann Arbor, MI, USA                 | 11187            |
| MG132                      | Sigma, St. Louis, MO, USA                  | M7449            |
| IPI-504                    | Medchemexpress, Monmouth Junction, NJ, USA | HY-10210         |
| Echinomycin                | Cayman, Ann Arbor, MI, USA                 | 11049            |
| CPI-613                    | Selleckchem, Houston, TX,USA               | S2776            |
| Plumbagin                  | Sigma, St. Louis, MO, USA                  | P7262            |

|                                                                          |                                             |                    |
|--------------------------------------------------------------------------|---------------------------------------------|--------------------|
| Bortezomib                                                               | LC Laboratories, Woburn, MA, USA            | B-1408             |
| Wogonin                                                                  | Cayman, Ann Arbor, MI, USA                  | 14248              |
| Phenethyl isothiocyanate (PEITC)                                         | Sigma, St. Louis, MO, USA                   | 253731             |
| Spermine                                                                 | Sigma, St. Louis, MO, USA                   | S3256              |
| Trichostatin A (TSA)                                                     | Selleckchem, Houston, TX, USA               | S1045              |
| Vorinostat (SAHA)                                                        | Selleckchem, Houston, TX, USA               | S1047              |
| YM-155                                                                   | Cayman, Ann Arbor, MI, USA                  | 11490              |
| Hydrogen peroxide                                                        | Fisher Scientific, Pittsburgh, PA, USA      | H325               |
| n-acetyl cysteine (NAC)                                                  | Sigma, St. Louis, MO, USA                   | a7250              |
| MTT (3-(4,5-Dimethylthiazol-2-yl)-2,5-Diphenyltetrazolium Bromide) (MTT) | Sigma, St. Louis, MO, USA                   | M2128              |
| Ganciclovir (GCV)                                                        | Sigma, St. Louis, MO, USA                   | G2536              |
| Propidium iodide                                                         | Sigma, St. Louis, MO, USA                   | P4170              |
| 2-Mercaptoethanol                                                        | Sigma, St. Louis, MO, USA                   | M6250              |
| Polyethylene glycol 400                                                  | Hampton Research, Aliso Viejo, CA, USA      | HR2-603            |
| Phosal 50 PG                                                             | American Lecithin Company, Oxford, CT, USA  | 368315-3130003/020 |
| Collagenase, Type II                                                     | Thermo Fisher Scientific, Carlsbad, CA, USA | 17101-015          |
| Dispase II                                                               | Thermo Fisher Scientific, Carlsbad, CA, USA | 17105-041          |
| Collagen, Type I                                                         | Sigma, St. Louis, MO, USA                   | C3867              |
| Mouse laminin protein                                                    | Thermo Fisher Scientific, Carlsbad, CA, USA | 23017-015          |
| Murine Stem Cell Factor (mSCF)                                           | Peprtech, Rocky Hill, NJ, USA               | 250-03             |
| Murine Fms-related tyrosine kinase 3 ligand (mFlt-3)                     | Peprtech, Rocky Hill, NJ, USA               | 250-31L            |
| Murine Granulocyte Macrophage-Colony Stimulating Factor (mGM-CSF)        | Peprtech, Rocky Hill, NJ, USA               | 315-03             |
| Murine Interleukin-3 (mIL-3)                                             | Peprtech, Rocky Hill, NJ, USA               | 213-13             |
| Murine Thrombopoietin (mTPO)                                             | Peprtech, Rocky Hill, NJ, USA               | 315-14             |
| Murine Erythropoietin (mEPO)                                             | R&D Systems, Minneapolis, MN, USA           | 959-ME-010         |
| Murine Fibroblast Growth Factor-basic (bFGF)                             | Thermo Fisher Scientific, Carlsbad, CA, USA | PMG0033            |

\*Dr. Nukhet Arkin-Burns, University of Arkansas for Medical Science

\*\*Dr. Douglas Spitz, University of Iowa

**Supplementary Table 3. Antibodies for western blot analyses**

| <b>Antibody</b>                | <b>Clone</b> | <b>Antibody isotype</b> | <b>Catalog #</b> | <b>Concentration</b> |
|--------------------------------|--------------|-------------------------|------------------|----------------------|
| Bcl-2 <sup>1</sup>             | 50E3         | Rabbit IgG Monoclonal   | 2870S            | 1:1000               |
| Bcl-xL <sup>1</sup>            | –            | Rabbit IgG Polyclonal   | 2762S            | 1:1000               |
| Bak <sup>1</sup>               | D4E4         | Rabbit IgG Monoclonal   | 12105S           | 1:1000               |
| Bax <sup>1</sup>               | –            | Rabbit IgG Polyclonal   | 2772S            | 1:1000               |
| Mcl-1 <sup>1</sup>             | D35A5        | Rabbit IgG Monoclonal   | 5453S            | 1:1000               |
| Bim <sup>1</sup>               | C34C5        | Rabbit IgG Monoclonal   | 2933S            | 1:500                |
| Caspase-3 <sup>1</sup>         | –            | Rabbit IgG Polyclonal   | 9662S            | 1:1000               |
| Cleaved Caspase-3 <sup>1</sup> | –            | Rabbit IgG Polyclonal   | 9661S            | 1:1000               |
| Caspase-8 <sup>1</sup>         | 1C12         | Rabbit IgG Monoclonal   | 9746S            | 1:1000               |
| RIP1 <sup>1</sup>              | D94C12       | Rabbit IgG Monoclonal   | 3493S            | 1:1000               |
| Bid <sup>2</sup>               | –            | Rabbit IgG Polyclonal   | SC-11423         | 1:200                |
| $\beta$ -actin <sup>2</sup>    | –            | Goat IgG Polyclonal     | SC-1615          | 1:1000               |
| Bad <sup>3</sup>               | 48/Bad       | Mouse IgG2b             | 610391           | 1:500                |
| Noxa <sup>4</sup>              | 114C307      | Mouse IgG Monoclonal    | OP180            | 1:500                |

**Footnotes:** <sup>1</sup> Cell signaling, Danvers, MA, USA; <sup>2</sup> Santa Cruz, Dallas, Texas, USA; <sup>3</sup> BD Biosciences, San Jose, CA, USA; <sup>4</sup> EMD Millipore Corporation, San Diego, CA, USA.

**Supplementary Table 4. Antibodies for flow cytometry and cell sorting**

| <b>Antibody</b>           | <b>Clone</b> | <b>Antibody</b>   | <b>Conjugate</b> | <b>Concentration</b> |
|---------------------------|--------------|-------------------|------------------|----------------------|
| CD45R / B220 <sup>1</sup> | RA3–6B2      | IgG <sub>2a</sub> | purified         | 1:200                |
| CD3e <sup>1</sup>         | 145–2C11     | IgG <sub>1</sub>  | purified         | 1:200                |
| CD11b <sup>1</sup>        | M1/70        | IgG <sub>2b</sub> | purified         | 1:200                |
| Gr–1 <sup>1</sup>         | RB6–8C5      | IgG <sub>2b</sub> | purified         | 1:200                |
| Ter–119 <sup>1</sup>      | Ter–119      | IgG <sub>2b</sub> | purified         | 1:200                |
| CD45R / B220 <sup>1</sup> | RA3–6B2      | IgG <sub>2a</sub> | biotin           | 1:200                |
| CD3e <sup>1</sup>         | 145–2C11     | IgG <sub>1</sub>  | biotin           | 1:200                |
| CD11b <sup>1</sup>        | M1 / 70      | IgG <sub>2b</sub> | biotin           | 1:200                |
| Gr–1 <sup>1</sup>         | RB6–8C5      | IgG <sub>2b</sub> | biotin           | 1:200                |
| Ter–119 <sup>1</sup>      | Ter–119      | IgG <sub>2b</sub> | biotin           | 1:200                |
| CD16 / CD32 <sup>1</sup>  | 2.4G2        | IgG <sub>2b</sub> | Purified         | 1:200                |
| CD45.2 <sup>1</sup>       | 104          | IgG <sub>2a</sub> | FITC             | 1:100                |
| CD45R / B220 <sup>1</sup> | RA3–6B2      | IgG <sub>2a</sub> | APC              | 1:200                |
| CD45R / B220 <sup>1</sup> | RA3–6B2      | IgG <sub>2a</sub> | PE               | 1:200                |
| CD90.2 <sup>1</sup>       | 53–2.1       | IgG <sub>2a</sub> | APC              | 1:200                |
| CD11b <sup>1</sup>        | M1 / 70      | IgG <sub>2a</sub> | PE               | 1:200                |
| Gr–1 <sup>1</sup>         | RB6–8C5      | IgG <sub>2a</sub> | PE               | 1:200                |
| Streptavidin              | Streptavidin |                   | FITC             | 1:200                |
| Sca1 <sup>1</sup>         | E13–161.7    | IgG <sub>2a</sub> | PE               | 1:100                |
| Sca1 <sup>1</sup>         | E13–161.7    | IgG <sub>2a</sub> | PE–Cy™ 7         | 1:100                |
| CD135 <sup>1</sup>        | 4G8          | IgG <sub>1</sub>  | PE               | 1:100                |
| c–kit <sup>1</sup>        | 2B8          | IgG <sub>2b</sub> | APC–H7           | 1:100                |
| c–kit <sup>2</sup>        | 2B8          | IgG <sub>2b</sub> | APC–eFluor® 780  | 1:100                |
| CD150 <sup>2</sup>        | 9D1          | IgG <sub>2a</sub> | APC              | 1:100                |
| CD34 <sup>2</sup>         | RAM34        | IgG <sub>2a</sub> | Alexa Fluor® 700 | 1:20                 |
| Ki–67 <sup>2</sup>        | 20Raj1       | IgG <sub>1</sub>  | FITC             | 1:50                 |
| Ki–67 <sup>2</sup>        | 20Raj1       | IgG <sub>1</sub>  | Alexa Fluor® 700 | 1:50                 |

|                                               |         |                   |                  |        |
|-----------------------------------------------|---------|-------------------|------------------|--------|
| CD48 <sup>3</sup>                             | HM481   | IgG <sub>2a</sub> | Pacific blue     | 1:200  |
| γH2AX <sup>3</sup>                            | 2F3     | IgG <sub>1</sub>  | FITC             | 1:200  |
| CD93 <sup>2</sup>                             | AA4.1   | IgG <sub>2b</sub> | PE–Cy7           | 1:100  |
| IgM <sup>2</sup>                              | II/41   | IgG <sub>2a</sub> | APC              | 1:100  |
| p–p38 <sup>4</sup>                            | 28B10   | IgG <sub>1</sub>  | Alexa Fluor® 488 | 1:100  |
| CD45 <sup>1</sup>                             | 30–F11  | IgG <sub>2b</sub> | APC              | 1:200  |
| CD11b <sup>1</sup>                            | M1 / 70 | IgG <sub>2b</sub> | APC              | 1:200  |
| Sca-1 <sup>2</sup>                            | D7      | IgG <sub>2a</sub> | Alexa Fluor® 700 | 1:200  |
| CXCR4 <sup>3</sup>                            | L276F12 | IgG <sub>2b</sub> | PE               | 1:50   |
| Integrin β1 <sup>3</sup>                      | HMβ1–1  | IgG               | Pacific blue     | 1:800  |
| P16 <sup>5</sup>                              | F–12    | IgG <sub>2a</sub> | purified         | 1:100  |
| γH2AX <sup>6</sup>                            | JBW301  | IgG <sub>1</sub>  | purified         | 1:1000 |
| Pax7 <sup>8</sup>                             | —       | MIgG1, kappa      | purified         | 1:20   |
| Goat Anti–<br>Mouse IgG<br>(H+L) <sup>7</sup> | —       | IgG (H+L)         | Alexa Fluor® 488 | 1:1000 |

**Footnotes:** <sup>1</sup>BD Biosciences, San Jose, CA; <sup>2</sup>eBioscience, San Jose, CA; <sup>3</sup>Biolegend, San Diego, CA; <sup>4</sup>Cell Signaling, Danvers, MA, USA; <sup>5</sup>Santa Cruz Biotechnology, Dallas, TX, USA; <sup>6</sup>EMD Millipore Corporation, San Diego, CA, USA; <sup>7</sup>Thermo Fisher Scientific, Carlsbad, CA, USA; <sup>8</sup>Developmental Studies Hybridoma Bank, Iowa City, IA, USA.

**Supplementary Table 5. Sequences of the primers used for qRT-PCR**

| Gene                             | Forward sequences                 | Reverse sequences                |
|----------------------------------|-----------------------------------|----------------------------------|
| Human <i>CDKN2A</i> <sup>1</sup> | 5-CCAACGCACCGAATAGT<br>TACG-3     | 5-GCGCTGCCCATCATCA<br>TG-3       |
| Human <i>CDKN1A</i> <sup>2</sup> | 5-GACAGCAGAGGAAG<br>ACCATGTGGAC-3 | 5-GAGTGGTAGAAATCTGTC<br>ATGCTG-3 |
| Human <i>GAPDH</i> <sup>1</sup>  | Cat# 4331182                      | Cat# 4331182                     |
| Mouse <i>Cdkn2a</i> <sup>1</sup> | 5-CGGTCGTACCCCGATTC<br>AG-3       | 5-GCACCGTAGTTGAGCAG<br>AAGAG-3   |
| Mouse <i>Hprt</i> <sup>1</sup>   | Cat# 4351370                      | Cat# 4351370                     |
| Mouse <i>Il1a</i> <sup>2</sup>   | 5-CCATAACCCATGATCTG<br>GAAGAGAC-3 | 5-GTCCACATCCTGATAT<br>ATAGTTTG-3 |
| Mouse <i>Il1b</i> <sup>2</sup>   | 5-CCATAACCCATGATCTG<br>GAAGAGAC-3 | 5-GTCCACATCCTGATATAT<br>AGTTTG-3 |
| Mouse <i>Il6</i> <sup>2</sup>    | 5-CTGCAAGAGACTTCCAT<br>CCAG-3     | 5-AGTGGTATAGACAGGTCT<br>GTTGG-3  |
| Mouse <i>Tgfb1</i> <sup>2</sup>  | 5-CCACGTGGAAATCAACG<br>GGATCAG-3  | 5-GTGCCGTGAGCTGTGCA<br>GGTGCTG-3 |
| Mouse <i>Tnfa</i> <sup>2</sup>   | 5-TGAACTTCGGGGTGATC<br>GGTC-3     | 5-CACTTGGTGGTTTGCTAC<br>GACG-3   |
| Mouse <i>Ccl5</i> <sup>2</sup>   | 5-CCCGCACCTGCCTCACC<br>ATATGG-3   | 5-CCTTCGAGTGACAAACAC<br>GACTG-3  |
| Mouse <i>Cxcl10</i> <sup>2</sup> | 5-GGTCTGAGTGGGACTCA<br>AGGGATC-3  | 5-TCATCGTGGCAATGATCT<br>CAACAC-3 |
| Mouse <i>Hprt</i> <sup>2</sup>   | 5-AGCAGTACAGCCCCAAA<br>ATGGTTA-3  | 5-TCAAGGGCATATCCAA<br>CAACAAAC-3 |

**Footnotes:** <sup>1</sup>Life technologies, Grand Island, NY, USA; <sup>2</sup>Integrated DNA Technologies, Coralville, IA, USA
